# Supplementary material for: Lipoteichoic acid of Streptococcus oralis Uo5: a novel biochemical structure comprising an unusual phosphorylcholine substitution pattern compared to Streptococcus pneumoniae
Source: PubMed Central journal article supplement (PMC4649388; doi:10.1038/srep16718), 2015-11-18
Supplement: srep16718-s1.pdf [file srep16718-s1.pdf]

# SUPPLEMENTARY INFORMATION

## **Lipoteichoic acid of *Streptococcus oralis* Uo5: a novel biochemical structure comprising an unusual phosphorylcholine substitution pattern compared to *Streptococcus pneumoniae***

Nicolas Gisch<sup>1,\*</sup>, Dominik Schwudke<sup>1</sup>, Simone Thomsen<sup>1</sup>, Nathalie Heß<sup>2</sup>, Regine Hakenbeck<sup>2</sup>, and Dalia Denapaite<sup>2</sup>

<sup>1</sup>Division of Bioanalytical Chemistry, Priority Area Infections, Research Center Borstel, Leibniz-Center for Medicine and Biosciences, Parkallee 1-40, 23845 Borstel, Germany

<sup>2</sup>Department of Microbiology, University of Kaiserslautern, Paul-Ehrlich Straße 24, 67663 Kaiserslautern, Germany

\*Correspondence to: Nicolas Gisch, Division of Bioanalytical Chemistry, Research Center Borstel, Leibniz-Center for Medicine and Biosciences, Parkallee 4a/4c, 23845 Borstel, Germany. Email: [ngisch@fz-borstel.de](mailto:ngisch@fz-borstel.de)

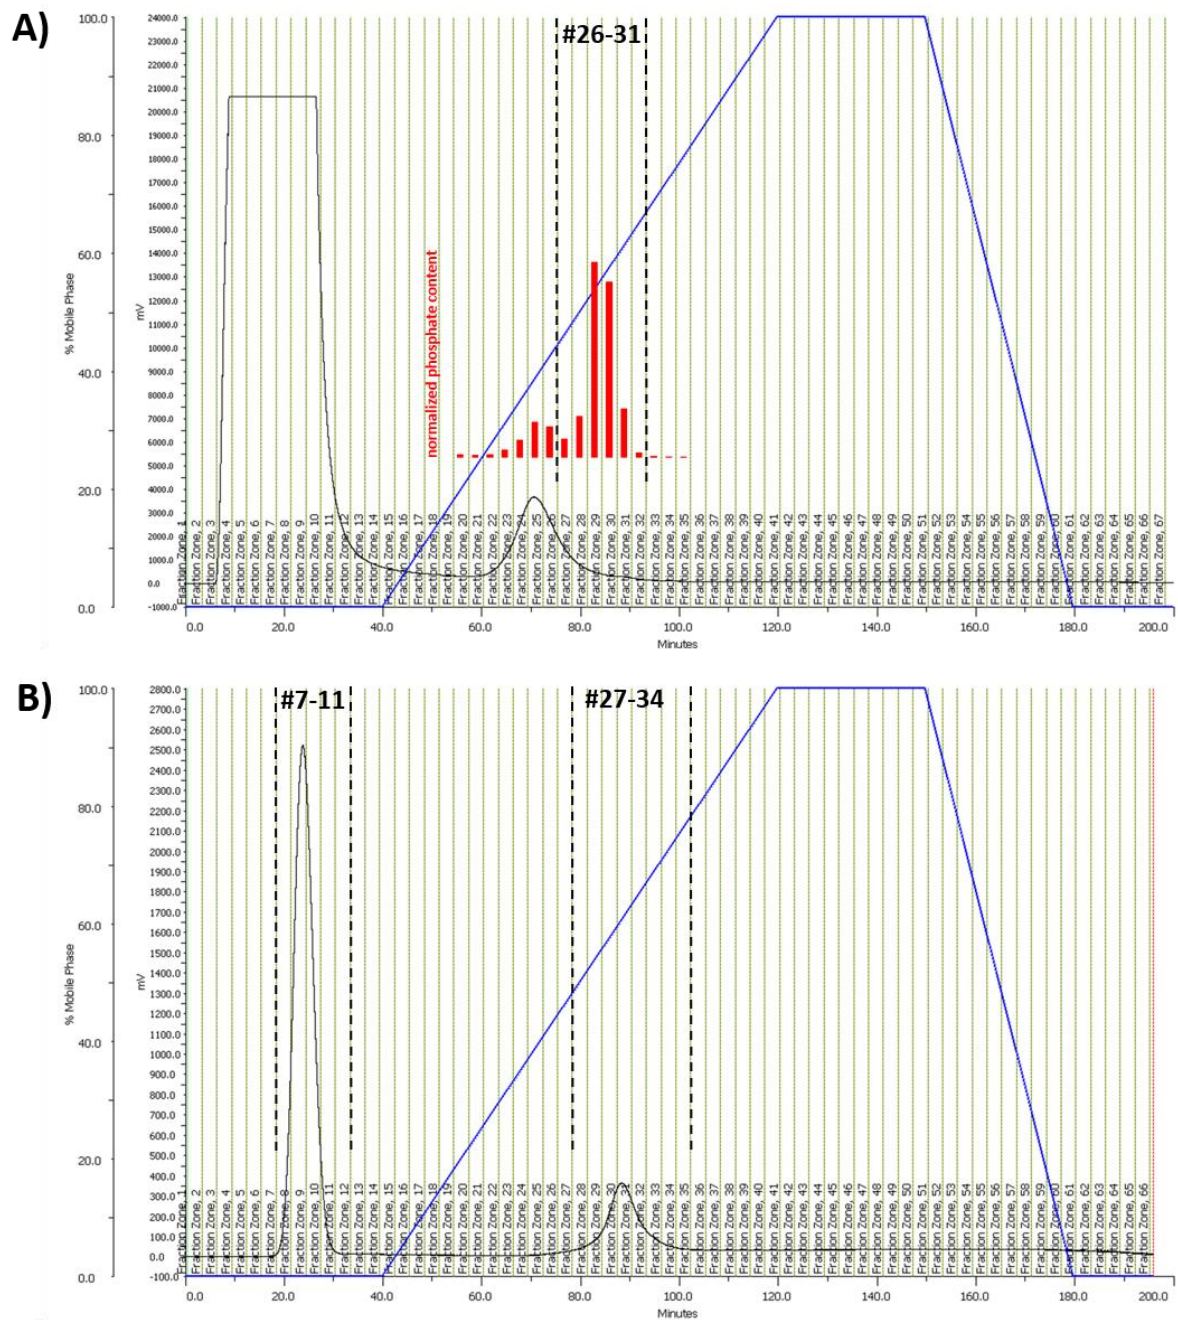

**Figure S1.** Representative chromatogram of the hydrophobic interaction chromatography of A) native *S. oralis* Uo5 $\Delta$ cps LTA including normalized visualization of the phosphate content of selected fractions and B) *S. oralis* Uo5 $\Delta$ cps LTA after 2 d HF treatment (UV detection in A) and B) at  $\lambda = 254$  nm). In A) combining of fractions is based on the phosphate content, fractions #26-31 contain the LTA. The major UV absorption observed in fractions #21-25 is caused by other, non-LTA species, such as lipopeptides. In B) combining of fractions is based on the UV absorption, since HF treatment removes the phosphate groups (**Attention:** consider the 10-fold less mV-scale in B) compared to A)). Fractions #7-11 contain among other things the monoPS units **6a,b** and **7a,b**, their further purification is shown in Fig. S4. Fractions #27-34 contain the tsDAG **5**.

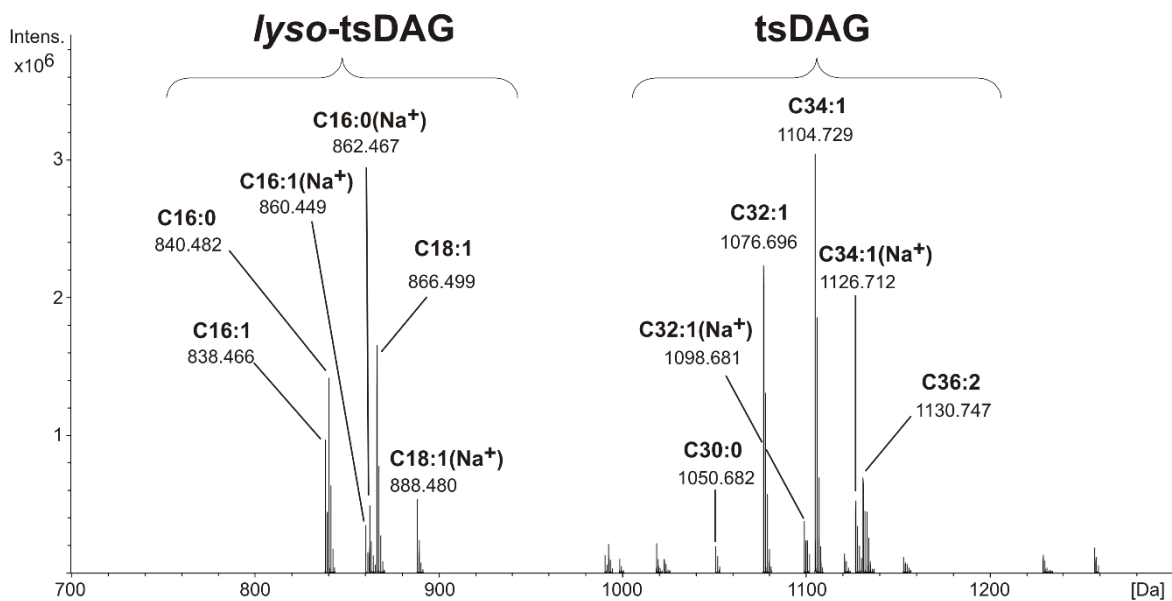

**Figure S2.** Section of the charge deconvoluted ESI-FT-ICR-MS spectrum (acquired in positive ion mode) of the pool comprising the lipid anchor-containing tsDAG **5** and respective monoacylated variants (*lyso*-tsDAG) obtained by HIC purification (fractions 27-34; Fig. S1B) after 2 d HF treatment of *S. oralis* Uo5Δcps LTA.

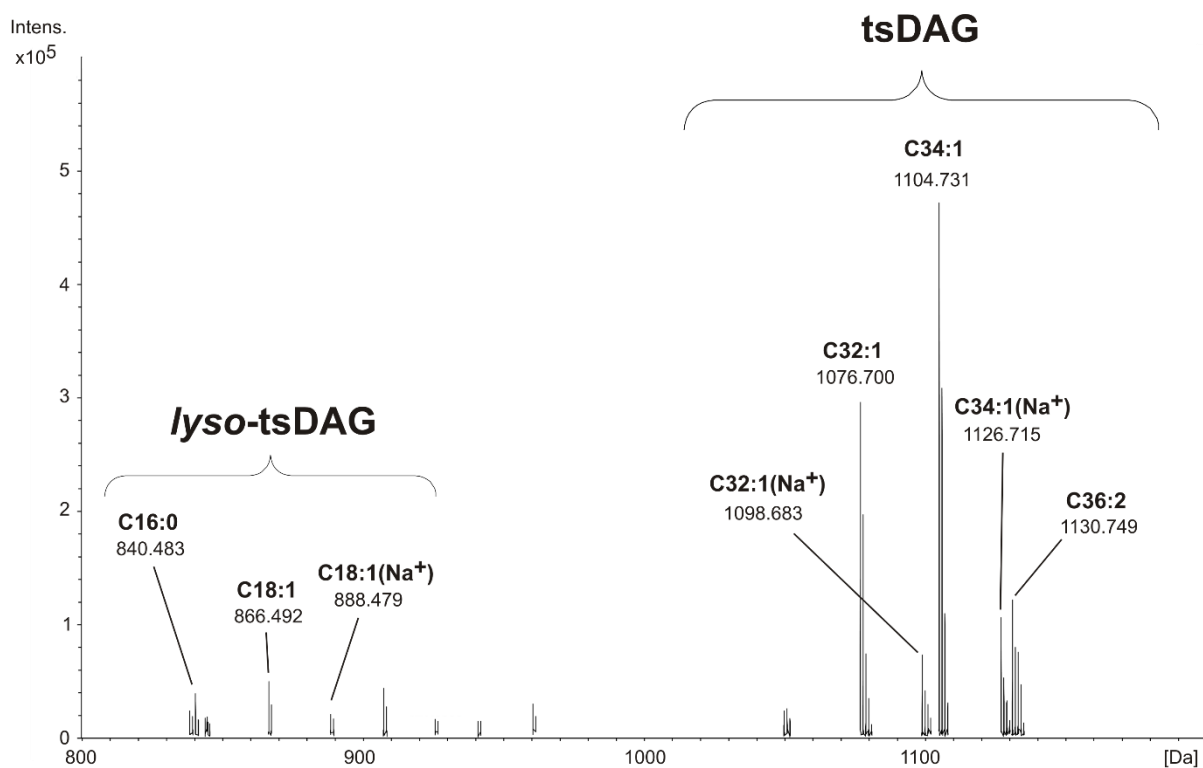

**Figure S3.** Section of the charge deconvoluted ESI-FT-ICR-MS spectrum (acquired in positive ion mode) after 8 h HF treatment of *S. oralis* Uo5Δcps LTA.

**Table S1.**  $^1\text{H}$  (700.4 MHz) and  $^{13}\text{C}$  NMR (176.1 MHz) chemical shift data ( $\delta$ , ppm) [ $J$ , Hz] for **5** isolated from *S. oralis* Uo5 $\Delta$ *cps* LTA after 2 d HF treatment (fractions 27-34; Fig. S1B). Values for fatty acid residues and the additionally present *lyso*-compounds (appr. 25%) are not listed. \*non-resolved multiplet.

| Sugar residue                                         | H-1<br><i>C-1</i>                                      | H-2<br><i>C-2</i>                  | H-3<br><i>C-3</i>                        | H-4<br><i>C-4</i>             | H-5<br><i>C-5</i>             | H-6<br><i>C-6</i>                              | NAc                                 |
|-------------------------------------------------------|--------------------------------------------------------|------------------------------------|------------------------------------------|-------------------------------|-------------------------------|------------------------------------------------|-------------------------------------|
| $\beta$ -D-Galp-(1 $\rightarrow$ )                    | 4.32 [7.7]<br><i>106.4</i>                             | 3.54 [9.8,<br>8.0]<br><i>72.2</i>  | 3.44 [9.8,<br>3.3]<br><i>74.4</i>        | 3.81-<br>3.77*<br><i>70.1</i> | 3.52-<br>3.47*<br><i>76.8</i> | 3.71-3.66*/<br>3.75 [11.6, 7.2]<br><i>62.5</i> |                                     |
| $\rightarrow$ 3)- $\beta$ -AATGalp-(1 $\rightarrow$ ) | 4.65 [8.5]<br><i>103.3</i>                             | 3.92 [10.8,<br>8.5]<br><i>52.5</i> | 3.88-3.84*<br><i>81.5</i>                | 3.29-<br>3.26*<br><i>55.1</i> | 3.83-<br>3.77*<br><i>70.7</i> | 1.32-1.28*<br><i>16.9</i>                      | 1.98<br><i>23.1</i><br><i>174.5</i> |
| $\rightarrow$ 3)- $\alpha$ -D-Glcp(1 $\rightarrow$ )  | 4.79 [3.6]<br><i>100.4</i>                             | 3.52-3.48*<br><i>72.4</i>          | 3.68-3.64*<br><i>84.4</i>                | 3.39-<br>3.33*<br><i>69.7</i> | 3.62-<br>3.57*<br><i>73.3</i> | 3.70-3.65*/<br>3.82-3.77*<br><i>62.2</i>       |                                     |
| $\rightarrow$ 3)-Gro(acyl) <sub>2</sub>               | 4.21 [12.6,<br>6.7]/4.47<br>[12.1, 3.8]<br><i>63.5</i> | 5.28-5.24*<br><i>71.3</i>          | 3.68-3.62*/<br>3.90-3.86*<br><i>66.9</i> |                               |                               |                                                |                                     |

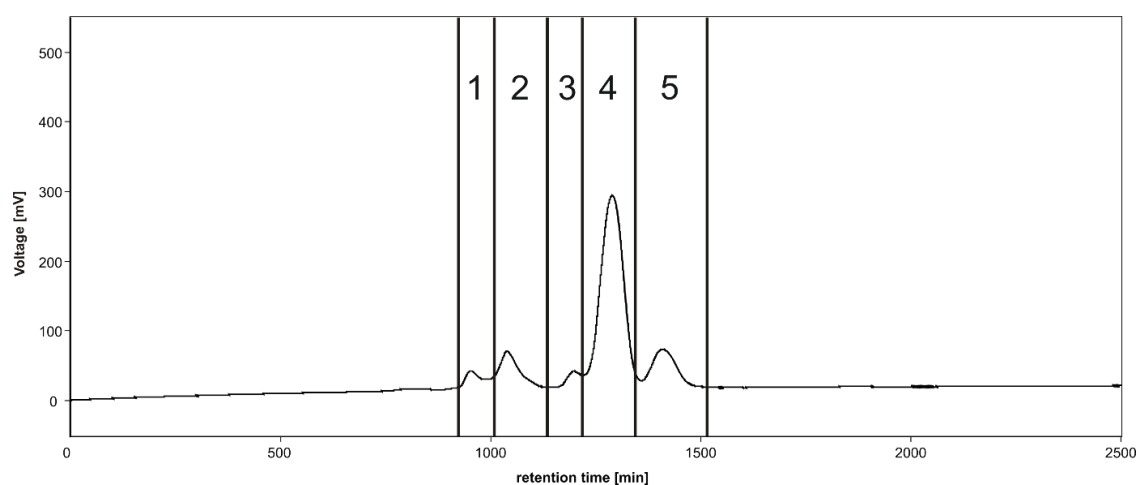

**Figure S4.** Representative chromatogram of a gel permeation chromatography (GPC; Bio-Gel P-10 column, 150 mM ammonium acetate (pH 4.7)) of the monomerized polysaccharide units containing pool after HIC purification (fractions 7-11; Fig. S1B) of 2 d HF treated LTA. Pool 1 contained **6a** and **6b**, pool 2 **7a** and **7b**, respectively.

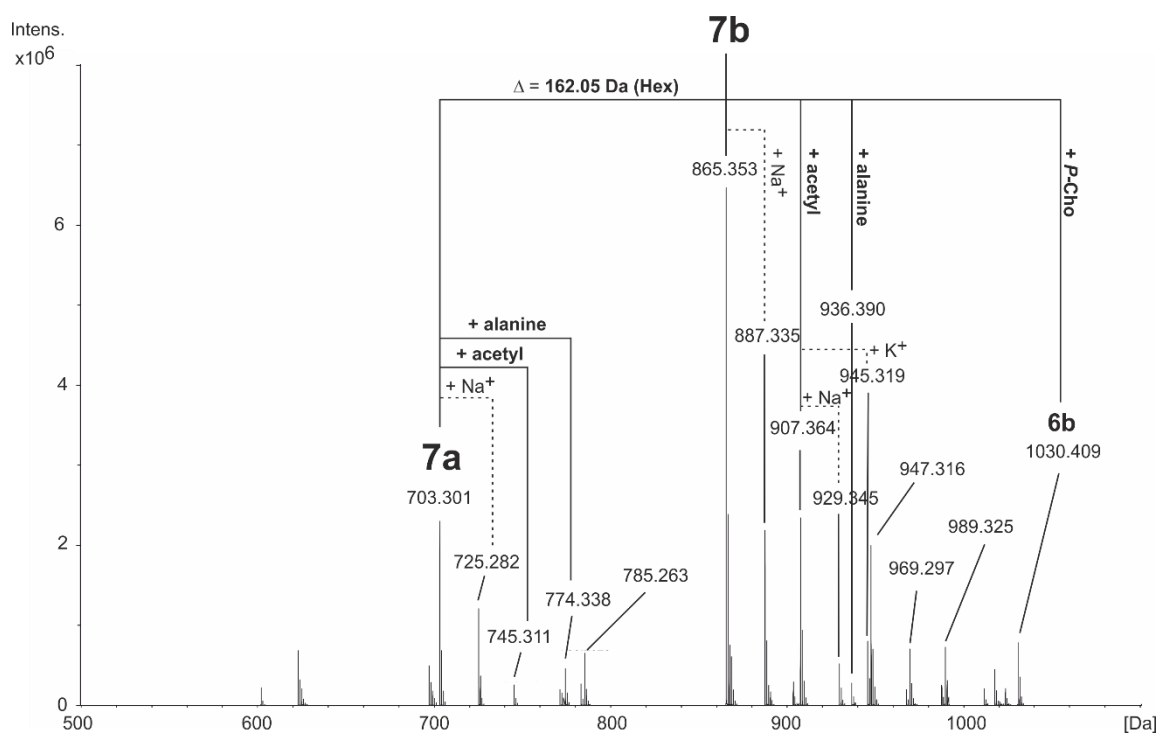

**Figure S5.** Section of the charge deconvoluted ESI-FT-ICR-MS spectra (acquired in positive ion mode) of **7a,b** obtained after 2 d HF treatment of LTA of *S. oralis* Uo5 $\Delta$ *eps* and subsequent purification by HIC and GPC (P-10 pool 2 in Fig. S4). Besides the major molecule **7b** with a  $MW_{\text{found}}$  of 865.353 Da ( $MW_{\text{calc}}$ : 865.347 Da), a second compound with one hexose less (**7a**;  $MW_{\text{found}}$ : 703.301 Da;  $MW_{\text{calc}}$ : 703.298 Da) was observed. For both molecules, variants with a bound alanine or acetyl residue (Table S2) have been identified with very small signal intensity as well.

**Table S2.** Summary of selected calculated and observed molecular masses [Da] for the isolated monoPS units of *S. oralis* LTA after 2 d HF treatment (**6a,b**: P-10 pool 1 of Fig. S4, MS spectrum in Fig. 2; **7a,b**: P-10 pool 2 of Fig. S4, MS spectrum in Fig. S5). Structures are shown in Fig. 1.

| <b>Compound</b>                  | <b>Calculated</b> | <b>Observed</b> |
|----------------------------------|-------------------|-----------------|
| <b>6b</b>                        | <b>1030.403</b>   | <b>1030.408</b> |
| - $H^+$ + $Na^+$                 | 1052.385          | 1052.390        |
| + <i>acetyl</i>                  | 1072.413          | 1072.421        |
| + <i>acetyl</i> - $H^+$ + $Na^+$ | 1094.395          | 1094.401        |
| + <i>alanine</i>                 | 1101.440          | 1101.445        |
| <b>6a</b>                        | <b>868.353</b>    | <b>868.356</b>  |
| - $H^+$ + $Na^+$                 | 890.335           | 890.337         |
| + <i>acetyl</i>                  | 910.364           | 910.367         |
| + <i>alanine</i>                 | 939.390           | 939.393         |
| <b>7b</b>                        | <b>865.347</b>    | <b>865.353</b>  |
| - $H^+$ + $Na^+$                 | 887.329           | 887.335         |
| + <i>acetyl</i>                  | 907.358           | 907.364         |
| + <i>acetyl</i> - $H^+$ + $Na^+$ | 929.340           | 929.345         |
| + <i>alanine</i>                 | 936.384           | 936.390         |
| <b>7a</b>                        | <b>703.298</b>    | <b>703.301</b>  |
| - $H^+$ + $Na^+$                 | 725.280           | 725.282         |
| + <i>acetyl</i>                  | 745.308           | 745.311         |
| + <i>alanine</i>                 | 774.335           | 774.338         |

**Table S3.**  $^1\text{H}$  (700.7 MHz) and  $^{13}\text{C}$  NMR (176.2 MHz) chemical shift data ( $\delta$ , ppm) [ $J$ , Hz] for **6a,b** isolated from *S. oralis* Uo5 $\Delta$ *cps* LTA after 2 d HF treatment (P-10 pool 1 of Fig. S4). \*non-resolved multiplet.

| Residue<br>(assignment,<br>abundance)                                                               | H-1<br>C-1                             | H-2<br>C-2               | H-3<br>C-3              | H-4<br>C-4              | H-5<br>C-5                       | H-6<br>C-6         | NAc                   |
|-----------------------------------------------------------------------------------------------------|----------------------------------------|--------------------------|-------------------------|-------------------------|----------------------------------|--------------------|-----------------------|
| $\alpha$ -D-Galp-(1 $\rightarrow$ )<br>(E, 0.7)                                                     | 5.13 [3.3]<br>96.0                     | 3.86-3.83*<br>68.9       | 3.96-3.92*<br>69.8      | 4.02-3.99*<br>69.8      | 4.21-4.17*<br>71.4               | 3.74-3.70*<br>61.5 |                       |
| $\rightarrow$ 3)- $\beta$ -D-Galp-(1 $\rightarrow$ )<br>(C, 0.7)                                    | 4.50 [7.7]<br>105.2                    | 3.67-3.62*<br>69.8       | 3.75-3.70*<br>77.8      | 4.16-4.13*<br>65.4      | 3.72-3.68*<br>74.5               | 3.77-3.70*<br>61.6 |                       |
| $\beta$ -D-Galp-(1 $\rightarrow$ )<br>(C <sup>#</sup> , 0.3)                                        | 4.44 [7.7]<br>105.3                    | 3.54-3.50*<br>71.2       | 3.63-3.59*<br>73.1      | 3.92-3.88*<br>69.2      | 3.69-3.66*<br>74.5               | 3.77-3.70*<br>61.6 |                       |
| $\rightarrow$ 3)- $\beta$ -AATGalp-<br>(1 $\rightarrow$ )<br>(B, 1.0)                               | 4.68-4.64*<br>102.7                    | 4.03-3.98*<br>51.2       | 3.95-3.91*<br>80.7      | 3.40-3.34*<br>54.3      | 3.89-3.84*<br>69.9               | 1.28 [5.9]<br>16.5 | 2.06<br>22.9<br>175.6 |
| <b>B<sup>#</sup></b>                                                                                |                                        |                          | 3.96-3.92*<br>80.1      |                         |                                  |                    |                       |
| $\rightarrow$ 4)- $\beta$ -D-3- <i>O</i> - <i>P</i> -Cho-<br>GalpNAc (1 $\rightarrow$ )<br>(D, 1.0) | 4.70-4.67*<br>102.3                    | 3.97-3.93*<br>52.6-52.5* | 4.24-4.21*<br>74.6-74.4 | 4.23-4.19*<br>75.9-75.7 | 3.66-3.62*<br>75.3               | 3.82-3.78*<br>61.6 | 2.02<br>23.0<br>175.0 |
| Cho- <i>P</i> -( <i>O</i> $\rightarrow$ )                                                           | 4.33-4.27*<br>4.24-4.18*<br>60.2 [4.9] | 3.69-3.65*<br>66.6-66.5* | 3.22<br>54.6            |                         |                                  |                    |                       |
| $\rightarrow$ 2-ribitol<br>(Rib-ol, 1.0)                                                            | 3.84-3.80*<br>3.70-3.66*<br>61.0       | 3.98-3.94*<br>81.8       | 3.88-3.85*<br>72.4      | 3.76-3.73*<br>72.1      | 3.81-3.77*<br>3.63-3.59*<br>63.4 |                    |                       |

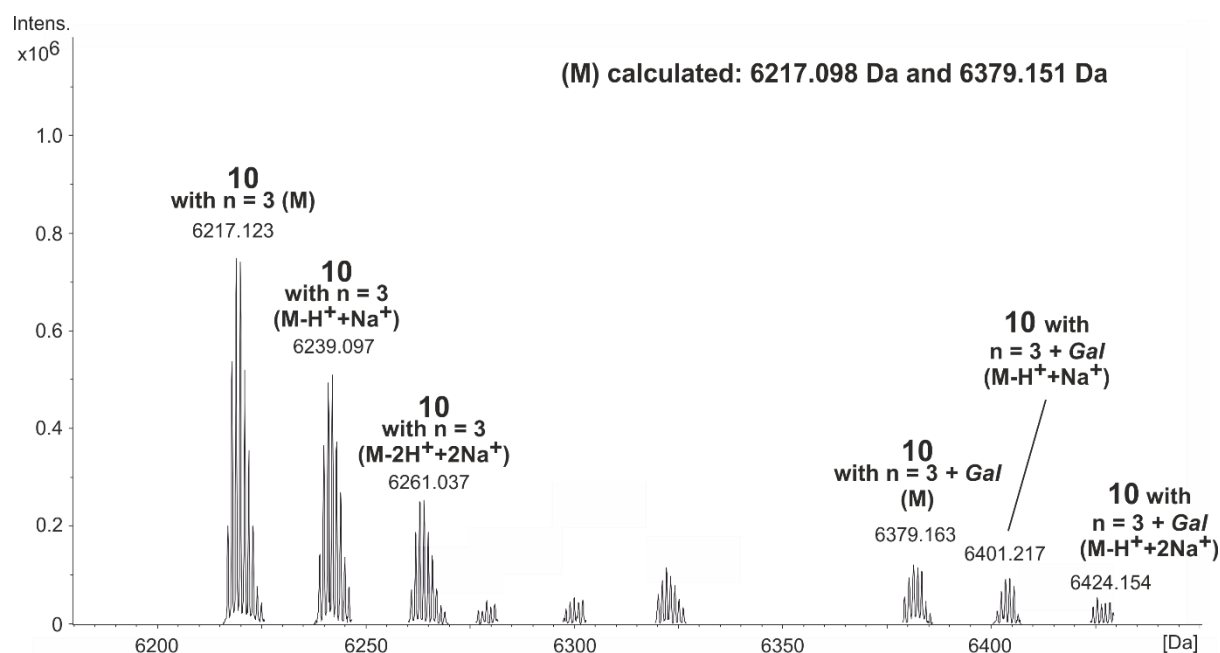

**Figure S6.** Magnification of the marked section in Fig. 4 (dotted square) of the ESI-FT-ICR-MS spectra of **10** (for structure see Fig. 5A) indicating the presence of a small population of LTA molecules with just one RU without an  $\alpha$ -Gal moiety.

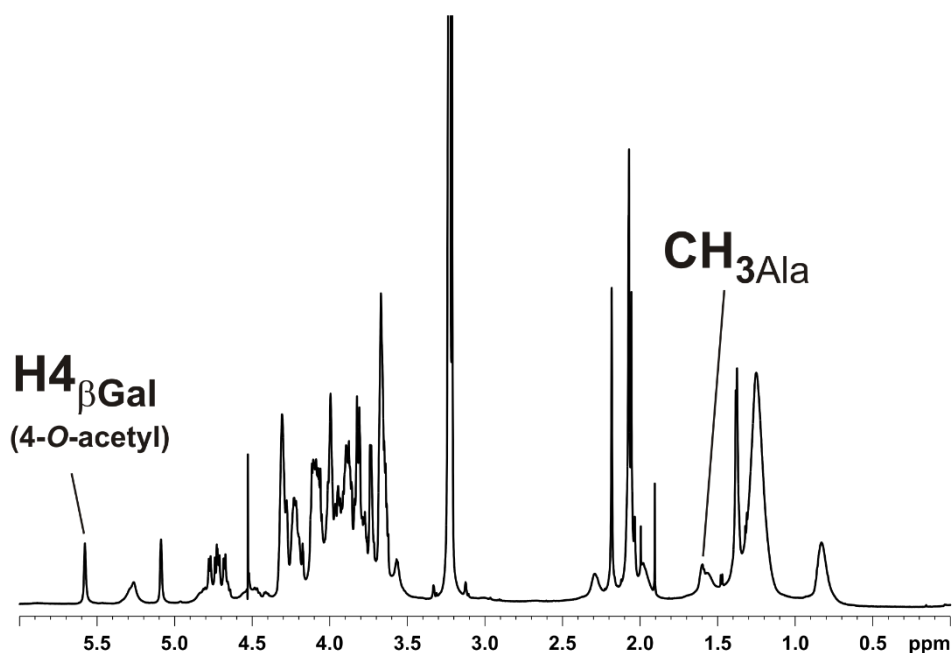

**Figure S7.** Section ( $\delta_{\text{H}}$  6.0-0.0) of the  $^1\text{H}$  NMR of *S. oralis* Uo5 $\Delta$ *cps* LTA measured in  $\text{D}_2\text{O}$  at 325 K.

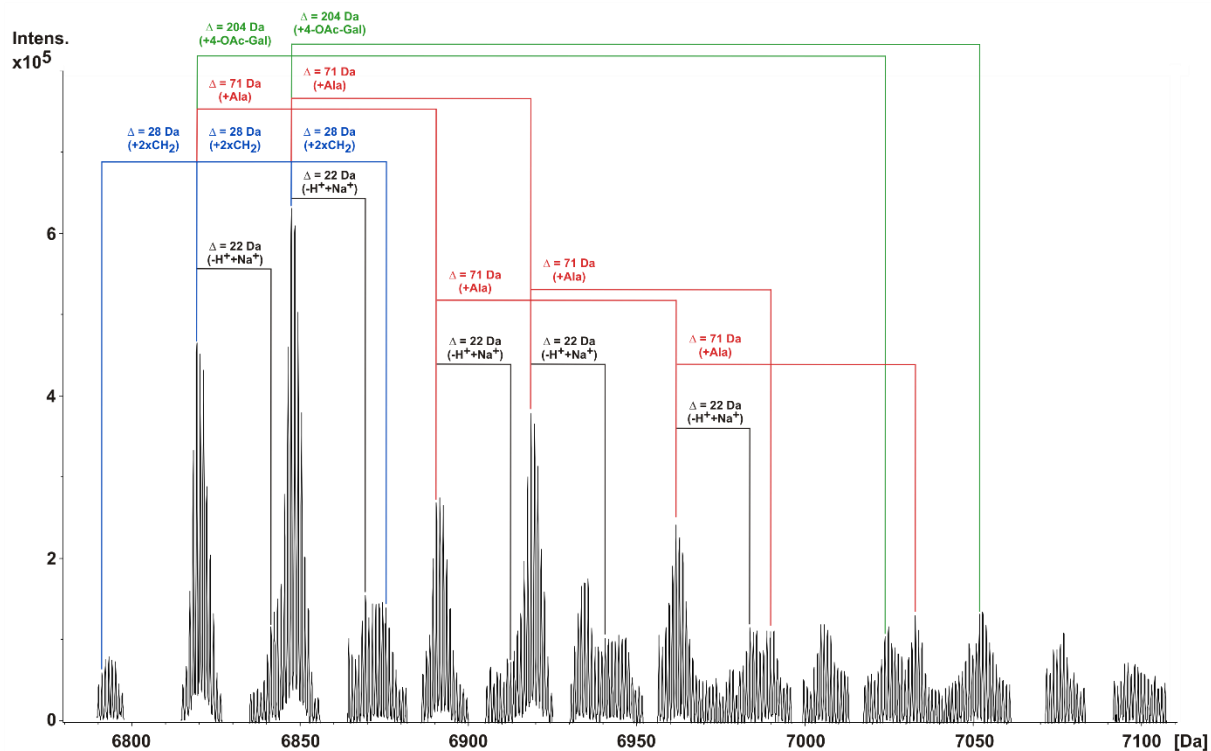

**Figure S8.** Magnified section of the MS spectra of natural LTA of *S. oralis* Uo5 $\Delta$ *cps* shown in Fig. 6. The isolated LTA fraction contained molecules with different fatty acid compositions;  $(\text{CH}_2)_2$ -unit differences for fully saturated species are indicated ( $\Delta = 28$  Da); molecular species containing one to three alanine substituents ( $\Delta = 71$  Da) or one additional 4-OAc-galactose moiety were detected ( $\Delta = 204$  Da). Assigned molecular species are listed in Table S4.



**Table S4.** Assigned molecular species of *S. oralis* Uo5Δ*cps* LTA considering different fatty acid combinations, different numbers of RUs, and potential additional substituents.

| LTA species: Gro + Glc + |          |          | Monoisotopic mass [Da]        |                             | Mass accuracy [ppm] |
|--------------------------|----------|----------|-------------------------------|-----------------------------|---------------------|
| Fatty acids              | RU 1*    | RU 2**   | Calculated<br>(sodium adduct) | Observed<br>(sodium adduct) |                     |
|                          | <b>2</b> | <b>1</b> |                               |                             |                     |
| <b>32:1</b>              |          |          | 4218.694                      | 4218.710                    | 3.8                 |
| <b>32:0</b>              |          |          | 4220.710                      | 4220.723                    | 3.1                 |
| <b>34:2</b>              |          |          | 4244.710                      | 4244.718                    | 1.9                 |
| <b>34:1</b>              |          |          | 4246.725                      | 4246.755                    | 7.1                 |
| <b>34:0</b>              |          |          | 4248.741                      | 4248.757                    | 3.8                 |
|                          | <b>2</b> | <b>2</b> |                               |                             |                     |
| <b>32:1</b>              |          |          | 5518.118                      | 5518.117                    | -0.2                |
| <b>32:0</b>              |          |          | 5520.134                      | 5520.115                    | -3.4                |
| <b>34:2</b>              |          |          | 5544.134                      | 5544.149                    | 2.7                 |
| <b>34:1</b>              |          |          | 5546.150                      | 5546.146                    | -0.7                |
| <b>34:0</b>              |          |          | 5548.165                      | 5548.143                    | -4.0                |
|                          | <b>2</b> | <b>3</b> |                               |                             |                     |
| <b>30:0</b>              |          |          | 6791.527 (6813.509)           | 6791.540 ( <i>n.d.</i> )    | 1.9                 |
| <b>32:2</b>              |          |          | 6815.527 (6837.509)           | 6815.566 (6837.625)         | 5.7 (17.0)          |
| <b>32:1</b>              |          |          | 6817.543 (6839.525)           | 6817.569 (6839.579)         | 3.8 (7.9)           |
| <b>32:0</b>              |          |          | 6819.558 (6841.541)           | 6819.546 (6841.597)         | -1.8 (8.2)          |
| + 1 Ala                  |          |          | 6890.596 (6912.578)           | 6890.661 (6912.680)         | 9.4 (14.8)          |
| + 2 Ala                  |          |          | 6961.633 (6983.615)           | 6961.634 (6983.604)         | 0.1 (-1.6)          |
| + 3 Ala                  |          |          | 7032.670 (7054.652)           | 7032.577 (7054.598)         | -13.2 (-7.7)        |
| + 4-OAc-Gal              |          |          | 7023.618 (7045.601)           | 7023.578 (7045.494)         | -5.7 (-15.2)        |
| <b>34:2</b>              |          |          | 6843.558 (6865.541)           | 6843.615 (6865.614)         | 8.3 (10.6)          |
| <b>34:1</b>              |          |          | 6845.574 (6867.556)           | 6845.600 (6867.622)         | 3.8 (9.6)           |
| <b>34:0</b>              |          |          | 6847.590 (6869.572)           | 6847.649 (6869.631)         | 8.6 (8.6)           |
| + 1 Ala                  |          |          | 6918.627 (6940.609)           | 6918.684 (6940.636)         | 8.2 (3.9)           |
| + 2 Ala                  |          |          | 6989.664 (7011.646)           | 6989.614 ( <i>n.d.</i> )    | -7.2                |
| + 4-OAc-Gal              |          |          | 7051.650 (7073.632)           | 7051.600 (7073.535)         | -7.1 (-13.7)        |
| <b>36:2</b>              |          |          | 6871.590 (6893.572)           | 6871.640 (6893.669)         | 7.3 (14.1)          |
| <b>36:1</b>              |          |          | 6873.605 (6895.588)           | 6873.648 (6895.631)         | 6.3 (6.3)           |
| <b>36:0</b>              |          |          | 6875.621 (6897.603)           | 6875.660 (6897.658)         | 5.8 (8.0)           |
|                          | <b>2</b> | <b>4</b> |                               |                             |                     |
| <b>32:1</b>              |          |          | 8116.967                      | 8116.895                    | -8.9                |
| <b>32:0</b>              |          |          | 8118.983                      | 8118.901                    | -10.1               |
| <b>34:2</b>              |          |          | 8142.983                      | 8142.914                    | -8.5                |
| <b>34:1</b>              |          |          | 8144.999                      | 8144.894                    | -12.9               |
| <b>34:0</b>              |          |          | 8147.014                      | 8146.952                    | -7.6                |

\*RU 1 = 3,6-di-*O*-*P*-Cho-β-D-GalpNAc-(1→2)-Rib-ol-1-*P*-(*O*→6)-β-D-Galp-(1→3)-AATGalp (**8**)

\*\*RU 2 = 3,6-di-*O*-*P*-Cho-β-D-GalpNAc-(1→2)-Rib-ol-1-*P*-(*O*→6)-(3-α-D-Galp,4-OAc)-β-D-Galp-(1→3)-AATGalp (**9b**).

**Table S5.** Oligonucleotides used in this study.

| <b>Name</b>    | <b>Sequence (5'-3')</b>                          |
|----------------|--------------------------------------------------|
| U05_cps_pcr1_f | CCGTCAGGCTATCAACTTTGGTATTGATCG                   |
| U05_cps_pcr1_r | CCTCTGGAATAGGCGTCGACGCGAATAATCCCCTATACACGTTAATAG |
| U05_cps_pcr2_f | TAACGTGTATAGGGGATTATTCGCGTCGACGCCTATTCCAGAGG     |
| U05_cps_pcr2_r | GATTAATGAGTAACTTCAAATTCCTTCAGAAAAGATTAGATGTC     |
| U05_cps_pcr3_f | GACATCTAATCTTTTCTGAAGGAATTTGAAGTTACTCATTAATCAG   |
| U05_cps_pcr3_r | GTCGATGACCTACCTGATCCGCAAACAGAG                   |
